# Supplementary material
Source: Springer Nature journal article supplement (https://www.springermedizin.de/resource/supplementary/12933_2014_841_MOESM2_ESM.pdf/9539368)
Supplement: MOESM2 [file 9539368]

**Table A2. Patient demographics and baseline characteristics, by study**

|                                                       | Study 1 (CACZ885A2213) <sup>27</sup> |                             |                   |                     |                   |                             |                       |                   |                    |                  | Study 2 (CACZ885I2202) <sup>24, 25</sup> |                              |                          |                     |                  | Study 3 (CACZ885I2207) <sup>26</sup> |                        |                   |                       |                  |
|-------------------------------------------------------|--------------------------------------|-----------------------------|-------------------|---------------------|-------------------|-----------------------------|-----------------------|-------------------|--------------------|------------------|------------------------------------------|------------------------------|--------------------------|---------------------|------------------|--------------------------------------|------------------------|-------------------|-----------------------|------------------|
|                                                       | Cohort 1                             |                             | Cohort 2          |                     | Cohort 3          |                             |                       | Cohort 4          |                    | Total<br>(N=231) | Placebo<br>(N=179)                       | Intermediate<br>dose (N=188) | Medium<br>dose<br>(N=92) | High dose<br>(N=92) | Total<br>(N=551) | T2DM                                 |                        | IGT               |                       | Total<br>(N=244) |
|                                                       | Placebo<br>(N=5)                     | Intermediate<br>dose (N=10) | Placebo<br>(N=45) | High dose<br>(N=45) | Placebo<br>(N=24) | Intermediate<br>dose (N=49) | Medium dose<br>(N=23) | Placebo<br>(N=16) | Low dose<br>(N=20) |                  |                                          |                              |                          |                     |                  | Placebo<br>(N=65)                    | Medium dose<br>(N=125) | Placebo<br>(N=26) | Medium<br>dose (N=28) |                  |
| Age (years)                                           | 52±6.96                              | 53±7.6                      | 57.5±7.95         | 57.1±9.38           | 54.7±6.41         | 54.4±7.95                   | 55.1±9.28             | 56±8.67           | 53.9±9.07          | 55.6±8.35        | 54.3±10.15                               | 54.5±10.01                   | 53±9.29                  | 53.7±10.36          | 54.1±9.99        | 57.3±10.08                           | 58.5±9.89              | 57.3±10.15        | 52.8±10.9             | 57.4±10.18       |
| Age group (years), n (%)                              |                                      |                             |                   |                     |                   |                             |                       |                   |                    |                  |                                          |                              |                          |                     |                  |                                      |                        |                   |                       |                  |
| <65                                                   | 5 (100)                              | 9 (90.0)                    | 35 (77.8)         | 36 (80.0)           | 23 (95.8)         | 42 (85.7)                   | 20 (87.0)             | 9 (90.0)          | 17 (85.0)          | 196 (84.8)       | 148 (82.7)                               | 155 (82.4)                   | 79 (85.9)                | 73 (79.3)           | 455 (82.6)       | 46 (70.8)                            | 86 (68.8)              | 19 (73.1)         | 25 (89.3)             | 176 (72.1)       |
| ≥65                                                   | 0                                    | 1 (10.0)                    | 10 (22.2)         | 9 (20.0)            | 1 (4.2)           | 7 (14.3)                    | 3 (13.0)              | 1 (10.0)          | 3 (15.0)           | 35 (15.2)        | 31 (17.3)                                | 33 (17.6)                    | 13 (14.1)                | 19 (20.7)           | 96 (17.4)        | 19 (29.2)                            | 39 (31.2)              | 7 (26.9)          | 3 (10.7)              | 68 (27.9)        |
| Sex, n (%)                                            |                                      |                             |                   |                     |                   |                             |                       |                   |                    |                  |                                          |                              |                          |                     |                  |                                      |                        |                   |                       |                  |
| Male                                                  | 2 (40.0)                             | 4 (40.0)                    | 31 (68.9)         | 24 (53.3)           | 8 (33.3)          | 19 (38.8)                   | 9 (39.1)              | 8 (80.0)          | 10 (50.0)          | 115 (49.8)       | 105 (58.7)                               | 104 (55.3)                   | 45 (48.9)                | 57 (62.0)           | 311 (56.4)       | 38 (58.5)                            | 68 (54.4)              | 11 (42.3)         | 16 (57.1)             | 133 (54.5)       |
| Female                                                | 3 (60.0)                             | 6 (60.0)                    | 14 (31.1)         | 21 (46.7)           | 16 (66.7)         | 30 (61.2)                   | 14 (60.9)             | 2 (20.0)          | 10 (50.0)          | 116 (50.2)       | 74 (41.3)                                | 84 (44.7)                    | 47 (51.1)                | 35 (38.0)           | 240 (43.6)       | 27 (41.5)                            | 57 (45.6)              | 15 (57.7)         | 12 (42.9)             | 111 (45.5)       |
| Race, n (%)                                           |                                      |                             |                   |                     |                   |                             |                       |                   |                    |                  |                                          |                              |                          |                     |                  |                                      |                        |                   |                       |                  |
| Caucasian                                             | 4 (80.0)                             | 9 (90.0)                    | 43 (95.6)         | 42 (93.3)           | 21 (87.5)         | 46 (93.9)                   | 22 (95.7)             | 10 (100)          | 19 (95.0)          | 216 (93.5)       | 73 (40.8)                                | 79 (42.0)                    | 39 (42.4)                | 39 (42.4)           | 230 (41.7)       | 50 (76.9)                            | 89 (71.2)              | 17 (65.4)         | 18 (64.3)             | 174 (71.3)       |
| Black                                                 | 0                                    | 1 (10.0)                    | 1 (2.2)           | 2 (4.4)             | 3 (12.5)          | 3 (6.1)                     | 1 (4.3)               | 0                 | 1 (5.0)            | 12 (5.2)         | 9 (5.0)                                  | 8 (4.3)                      | 5 (5.4)                  | 3 (3.3)             | 25 (4.5)         | 1 (1.5)                              | 1 (0.8)                | 0                 | 1 (3.6)               | 3 (1.2)          |
| Asian                                                 | 0                                    | 0                           | 0                 | 0                   | 0                 | 0                           | 0                     | 0                 | 0                  | 75 (41.9)        | 81 (43.1)                                | 39 (42.4)                    | 41 (44.6)                | 236 (42.8)          | 14 (21.5)        | 29 (23.2)                            | 8 (30.8)               | 9 (32.1)          | 60 (24.6)             |                  |
| Others                                                | 1 (20.0)                             | 0                           | 1 (2.2)           | 1 (2.2)             | 0                 | 0                           | 0                     | 0                 | 0                  | 3 (1.3)          | 22 (12.3)                                | 20 (10.6)                    | 9 (9.8)                  | 9 (9.8)             | 60 (10.9)        | 0                                    | 6 (4.8)                | 1 (3.8)           | 0                     | 7 (2.9)          |
| BMI (kg/m <sup>2</sup> ), n (%)                       |                                      |                             |                   |                     |                   |                             |                       |                   |                    |                  |                                          |                              |                          |                     |                  |                                      |                        |                   |                       |                  |
| <30                                                   | 2 (40.0)                             | 5 (50.0)                    | 17 (37.8)         | 21 (46.7)           | 9 (37.5)          | 16 (32.7)                   | 7 (30.4)              | 7 (70.0)          | 9 (45.0)           | 93 (40.3)        | 104 (58.1)                               | 110 (58.5)                   | 44 (47.8)                | 51 (55.4)           | 309 (56.1)       | 29 (44.6)                            | 52 (41.6)              | 15 (57.7)         | 12 (42.9)             | 108 (44.3)       |
| ≥30                                                   | 3 (60.0)                             | 5 (50.0)                    | 28 (62.2)         | 24 (53.3)           | 15 (62.5)         | 33 (67.3)                   | 16 (69.6)             | 3 (30.0)          | 11 (55.0)          | 138 (59.7)       | 75 (41.9)                                | 78 (41.5)                    | 48 (52.2)                | 41 (44.6)           | 242 (43.9)       | 36 (55.4)                            | 73 (58.4)              | 11 (42.3)         | 16 (57.1)             | 136 (55.7)       |
| HbA1c (%)                                             | 7.1±0.66                             | 8.0±0.79                    | 7.8±0.82          | 7.9±0.68            | 7.6±0.89          | 7.5±0.7                     | 7.7±0.75              | 8±1.08            | 7.6±0.79           | 7.7±0.78         | 7.5±0.8                                  | 7.4±0.81                     | 7.4±0.78                 | 7.5±0.76            | 7.4±0.79         | 7.2±0.46                             | 7.1±0.44               | 6.1±0.41          | 6.1±0.65              | 6.9±0.64         |
| FPG (mmol/L)                                          | 8.9±2.6                              | 9.7±1.58                    | 8.9±1.68          | 9.0±1.62            | 8.8±1.5           | 9.1±2.15                    | 8.9±1.86              | 9.2±2.22          | 8.8±1.84           | 9.0±1.81         | 7.8±1.66                                 | 7.6±1.62                     | 7.8±1.79                 | 7.7±1.34            | 7.7±1.62         | 8.2±2.12                             | 7.8±1.85               | 5.8±0.65          | 5.9±0.66              | 7.5±1.94         |
| Duration of type 2 diabetes (years)                   | 8.6±3.4                              | 6.8±7.27                    | 6.2±5.14          | 7.9±5.29            | 5.9±4.93          | 7.3±4.76                    | 5.3±5.59              | 10.6±5.53         | 5.0±3.62           | 6.8±5.08         | 4.0±4.46                                 | 3.8±4.15                     | 3.4±3.91                 | 3.2±3.51            | 3.7±4.11         | 8.5±6.6                              | 9.9±7.59               | NA                | NA                    | 9.4±7.28         |
| Subjects with impaired glucose tolerance <sup>a</sup> | 0                                    | 0                           | 0                 | 0                   | 0                 | 0                           | 0                     | 0                 | 0                  | 0                | 0                                        | 0                            | 0                        | 0                   | 0                | 0                                    | 0                      | 26                | 28                    | 54               |
| Diabetes complications, n (%) <sup>b</sup>            |                                      |                             |                   |                     |                   |                             |                       |                   |                    |                  |                                          |                              |                          |                     |                  |                                      |                        |                   |                       |                  |
| Retinopathy                                           |                                      |                             |                   |                     |                   |                             |                       |                   |                    |                  | 6 (3.4)                                  | 3 (1.6)                      | 3 (3.3)                  | 1 (1.1)             | 13 (2.4)         | 2 (3.1)                              | 7 (5.6)                | 0                 | 0                     | 9 (4.7)          |
| Neuropathy                                            |                                      |                             |                   |                     |                   |                             |                       |                   |                    |                  | 10 (5.6)                                 | 25 (13.4)                    | 4 (4.3)                  | 11 (12.0)           | 50 (9.1)         | 9 (13.8)                             | 23 (18.4)              | 0                 | 0                     | 32 (16.8)        |
| Nephropathy                                           |                                      |                             |                   |                     |                   |                             |                       |                   |                    |                  | 4 (2.2)                                  | 2 (1.1)                      | 0                        | 4 (4.3)             | 10 (1.8)         | 3 (4.6)                              | 8 (6.4)                | 0                 | 0                     | 11 (5.8)         |
| Use of statins, n (%) <sup>c</sup>                    |                                      |                             |                   |                     |                   |                             |                       |                   |                    |                  |                                          |                              |                          |                     |                  |                                      |                        |                   |                       |                  |
| Yes                                                   | 0                                    | 0                           | 4 (8.9)           | 6 (13.3)            | 4 (16.7)          | 2 (4.1)                     | 2 (8.7)               | 1 (10.0)          | 2 (10.0)           | 21 (9.1)         | 43 (24.0)                                | 62 (33.0)                    | 25 (27.2)                | 26 (28.3)           | 156 (28.3)       | 28 (43.1)                            | 69 (55.2)              | 7 (26.9)          | 8 (28.6)              | 112 (45.9)       |
| No                                                    | 5 (100)                              | 10 (100)                    | 41 (91.1)         | 39 (86.7)           | 20 (83.3)         | 47 (95.9)                   | 21 (91.3)             | 9 (90.0)          | 18 (90.0)          | 210 (90.9)       | 136 (76.0)                               | 126 (67.0)                   | 67 (72.8)                | 66 (71.7)           | 395 (71.7)       | 37 (56.9)                            | 56 (44.8)              | 19 (73.1)         | 20 (71.4)             | 132 (54.1)       |

Data are expressed as mean±standard deviation (SD), unless otherwise stated.

BMI, body mass index; FPG, fasting plasma glucose; HbA1c, glycosylated haemoglobin A1c

Low dose: 0.03 mg/kg i.v. once; intermediate dose: 0.1 and 0.3 mg/kg i.v. once, 5 and 15 mg s.c. monthly; medium dose: 1.5 mg/kg i.v. once, 50 mg s.c. monthly and 150 mg s.c. once; high dose: 10 mg/kg i.v. once and 150 mg s.c. monthly.

<sup>a</sup>Pre-diabetic subjects with impaired glucose tolerance were enrolled only in study CACZ885I2207.

<sup>b</sup>Information on cardiovascular risk/ disease factors and diabetes complications was not collected in study CACZ885A2213.
